# Supplementary material
Source: HighWire-hosted journal article supplement (http://www.ajnr.org/highwire/filestream/78706/field_highwire_adjunct_files/0/20-00596.pdf)
Supplement: 20-00596.pdf [file 20-00596.pdf]

**On-line Table 1: Summary of DSC-PWI pulse-sequence parameters**

| DSC sequence   | Date (range)                | No. | Pulse Sequence Parameters |         |           |
|----------------|-----------------------------|-----|---------------------------|---------|-----------|
|                |                             |     | FA                        | TE (ms) | TR (ms)   |
| A              | January 2005 to July 2007   | 24  | 45°                       | 30      | 398–507   |
| B              | July 2007 to April 2015     | 122 | 7°                        | 25–30   | 16–20     |
| C <sup>a</sup> | August 2013 to October 2019 | 87  | 75°                       | 40      | 1522–1771 |
| All            |                             | 233 |                           |         |           |

**Note:**—FA indicates flip angle.

<sup>a</sup> Parameters in a single case of this group (corresponding to a training subset PCNSL) were FA, 60°; TE, 21 ms; TR, 2000 ms.

**On-line Table 2: Summary of DSC-PWI pulse-sequence parameter distribution into the study subgroups<sup>a</sup>**

|                 | Distribution by Tumor Diagnosis on Histology |    |    |     |     |
|-----------------|----------------------------------------------|----|----|-----|-----|
|                 | PCNSL                                        | GB | AA | MET | MEN |
| <b>Training</b> |                                              |    |    |     |     |
| DSC sequence    |                                              |    |    |     |     |
| A               | 3                                            | 4  | 5  | 3   | 4   |
| B               | 18                                           | 16 | 13 | 18  | 17  |
| C               | 12                                           | 15 | 11 | 15  | 15  |
| All             | 33                                           | 35 | 29 | 36  | 36  |
| <b>Test</b>     |                                              |    |    |     |     |
| DSC sequence    |                                              |    |    |     |     |
| A               | 1                                            | 1  | 1  | 1   | 1   |
| B               | 7                                            | 9  | 7  | 8   | 9   |
| C               | 6                                            | 3  | 2  | 4   | 4   |
| All             | 14                                           | 13 | 10 | 13  | 14  |

**Note:**—GB indicates glioblastoma; AA, anaplastic astrocytoma; MET, metastasis; MEN, meningioma.

<sup>a</sup> No significant differences in the distribution of the sequences into the study subgroups were found ( $P = .98$ ;  $\chi^2$ ).

**On-line Table 3: Demographics**

|                        | Cases | Men | Women | Age (range) |
|------------------------|-------|-----|-------|-------------|
|                        |       |     |       | (yr)        |
| PCNSL                  | 50    | 33  | 17    | 61 (31–82)  |
| Glioblastoma           | 50    | 32  | 18    | 60 (18–78)  |
| Anaplastic astrocytoma | 45    | 28  | 17    | 53 (18–85)  |
| Metastasis             | 50    | 25  | 25    | 60 (26–80)  |
| Meningioma             | 50    | 15  | 35    | 57 (34–82)  |
| Total                  | 245   | 133 | 112   | 59 (18–85)  |

**On-line Table 4: Classifier algorithms<sup>a</sup>**

| PCNSL vs Glioblastoma |                    | PCNSL vs Anaplastic Astrocytoma |                    |
|-----------------------|--------------------|---------------------------------|--------------------|
| Model_Variables       | Model_Coefficients | Model_Variables                 | Model_Coefficients |
| (Intercept)           | −6.14              | (Intercept)                     | −1.87              |
| 1 <sub>i</sub>        | −4.72              | 1 <sub>i</sub>                  | −2.31              |
| 2 <sub>i</sub>        | 21.43              | 1.8 <sub>i</sub>                | 3.89               |
| 2.2 <sub>i</sub>      | −42.32             | 2.6 <sub>i</sub>                | −49.37             |
| 2.4 <sub>i</sub>      | 16.35              | 2.8 <sub>i</sub>                | 59.61              |
| 3.6 <sub>i</sub>      | 2.69               | 3.2 <sub>i</sub>                | −15.2              |

<sup>a</sup> The classifier algorithms, with the intercept and the relative power (coefficient) for each selected normalized time point to apply on the formula: (Intercept)<sub>i</sub> +  $\sum$  (model\_variable, model\_coefficient). The model\_variables correspond to the normalized intensity value for each concrete normalized time point.

**On-line Table 5: Classifier algorithms<sup>a</sup>**

| PCNSL vs Metastasis |                    | PCNSL vs Meningioma |                    |
|---------------------|--------------------|---------------------|--------------------|
| Model_Variables     | Model_Coefficients | Model_Variables     | Model_Coefficients |
| (Intercept)         | 0.2                | (Intercept)         | -26.68             |
| 1.8 <sub>i</sub>    | 7.62               | 0.2 <sub>i</sub>    | 57.74              |
| 2 <sub>i</sub>      | -14.08             | 1 <sub>i</sub>      | -8.48              |
| 3.6 <sub>i</sub>    | -20.51             | 2 <sub>i</sub>      | -31.42             |
| 3.8 <sub>i</sub>    | 27.46              | 4.2 <sub>i</sub>    | 187.42             |
| 4.8 <sub>i</sub>    | -3.97              | 4.4 <sub>i</sub>    | -167.38            |

<sup>a</sup> The classifier algorithms, with the intercept and the relative power (coefficient) for each selected normalized time point to apply on the formula: (Intercept) +  $\sum$  (model\_variable<sub>i</sub> model\_coefficient<sub>i</sub>). The model\_variables correspond to the normalized intensity value for each concrete normalized time point.

**On-line Table 6: Diagnostic performance of conventional mean rCBV in the study population**

| Mean rCBV    | Threshold | AUC  | Accuracy    | Sensitivity  | Specificity |
|--------------|-----------|------|-------------|--------------|-------------|
| PCNSL vs GB  | 2.41      |      |             |              |             |
| Training     |           | 0.85 | 82% (56/68) | 85% (28/33)  | 80% (28/35) |
| Test         |           | 0.89 | 81% (22/27) | 93% (13/14)  | 69% (9/13)  |
| PCNSL vs AA  | 2.62      |      |             |              |             |
| Training     |           | 0.63 | 65% (40/62) | 91% (30/33)  | 34% (10/29) |
| Test         |           | 0.53 | 67% (16/24) | 100% (14/14) | 20% (2/10)  |
| PCNSL vs MET | 2.63      |      |             |              |             |
| Training     |           | 0.53 | 59% (41/69) | 91% (30/33)  | 31% (11/36) |
| Test         |           | 0.76 | 78% (21/27) | 100% (14/14) | 54% (7/13)  |
| PCNSL vs MEN | 2.58      |      |             |              |             |
| Training     |           | 0.89 | 86% (59/69) | 88% (29/33)  | 83% (30/36) |
| Test         |           | 0.96 | 89% (25/28) | 93% (13/14)  | 86% (12/14) |

**Note:**—GB indicates glioblastoma; AA, anaplastic astrocytoma; MET, metastasis; MEN, meningioma; AUC, area under the curve.

**On-line Table 7: Diagnostic performance of conventional mean PSR in the study population**

| Mean PSR     | Threshold | AUC  | Accuracy    | Sensitivity | Specificity  |
|--------------|-----------|------|-------------|-------------|--------------|
| PCNSL vs GB  | 123.46%   |      |             |             |              |
| Training     |           | 0.83 | 79% (54/68) | 72% (24/33) | 86% (30/35)  |
| Test         |           | 0.94 | 89% (24/27) | 93% (13/14) | 85% (11/13)  |
| PCNSL vs AA  | 125.36%   |      |             |             |              |
| Training     |           | 0.75 | 73% (45/62) | 70% (23/33) | 76% (22/29)  |
| Test         |           | 0.85 | 83% (20/24) | 93% (13/14) | 70% (7/10)   |
| PCNSL vs MET | 124.20%   |      |             |             |              |
| Training     |           | 0.86 | 78% (54/69) | 70% (23/33) | 86% (31/36)  |
| Test         |           | 0.99 | 96% (26/27) | 93% (13/14) | 100% (13/13) |
| PCNSL vs MEN | 130.43%   |      |             |             |              |
| Training     |           | 0.76 | 72% (50/69) | 67% (22/33) | 78% (28/36)  |
| Test         |           | 0.92 | 79% (22/28) | 86% (12/14) | 71% (10/14)  |

**Note:**—GB indicates glioblastoma; AA, anaplastic astrocytoma; MET, metastasis; MEN, meningioma; AUC, area under the curve.

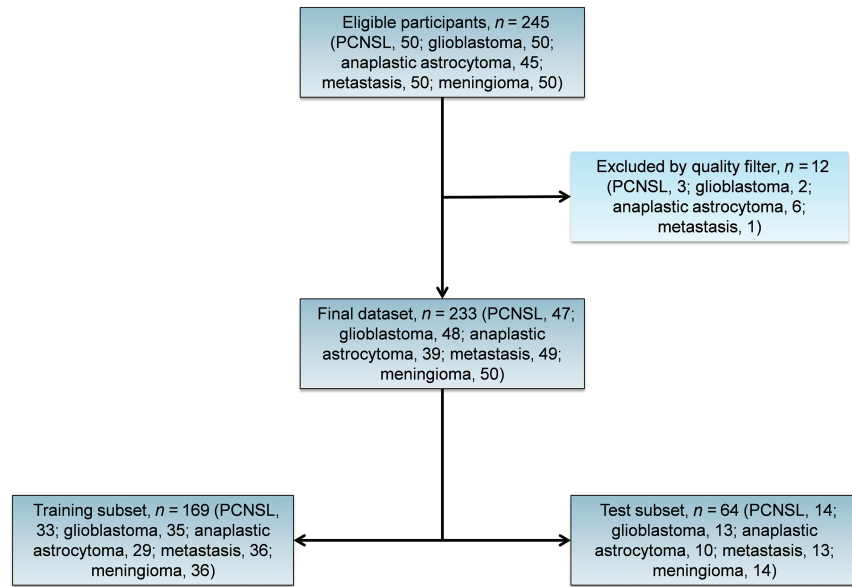

**ON-LINE FIGURE.** Study participants' flow diagram.
